# Supplementary material
Source: Springer Nature journal article supplement (https://www.springermedizin.de/resource/supplementary/12943_2013_1250_MOESM4_ESM.pdf/9553056)
Supplement: MOESM4 [file 9553056]

#### Additional file 4

H3K9ac or E2F1 enrichment after silencing or overexpression of BRCA1 in

293T cells, and primary non-mutated and BRCA1-mutated breast cancer and their normal breast cells

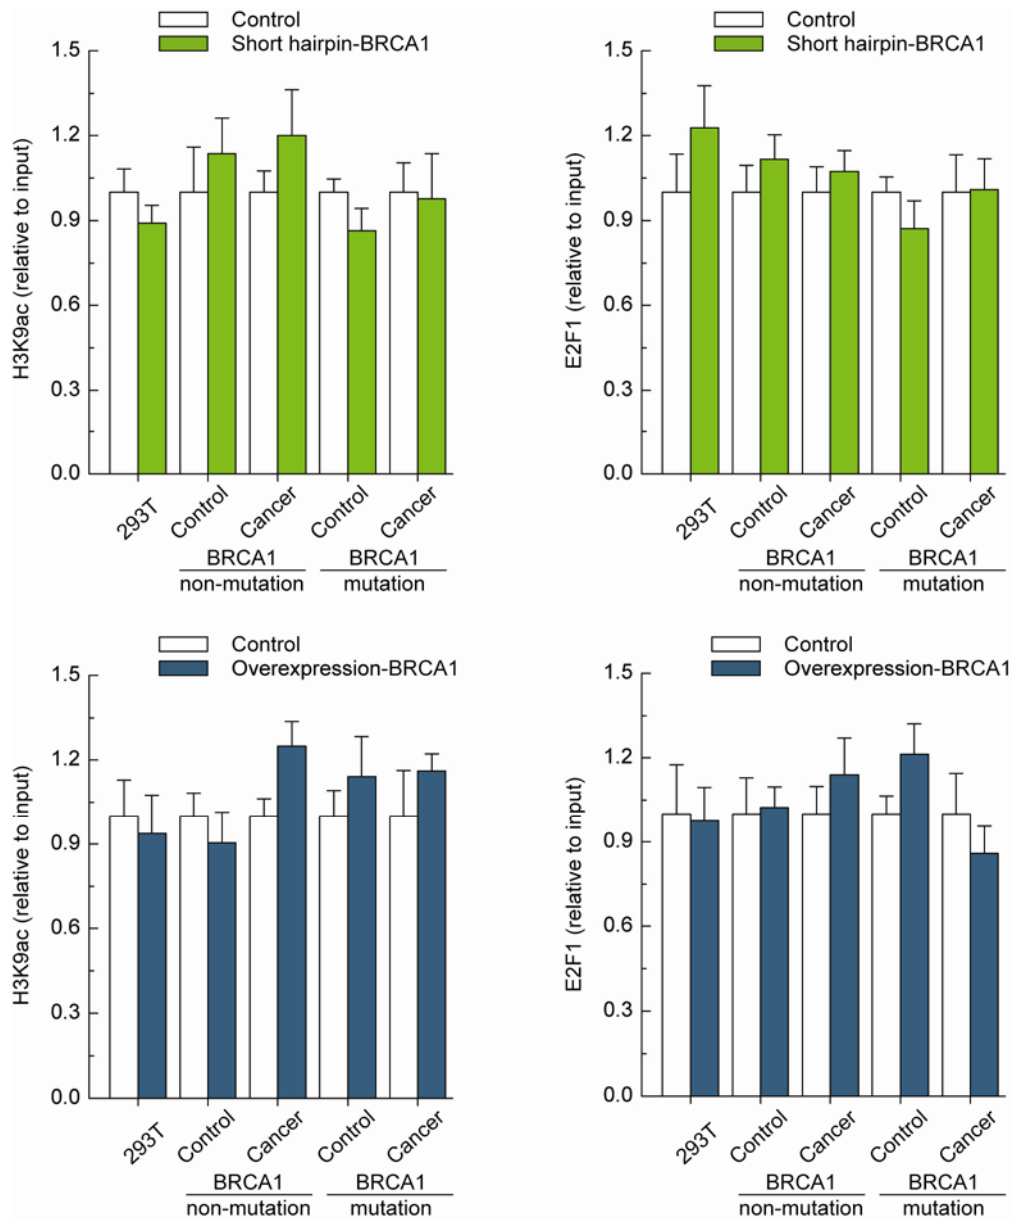

Each experiment was repeated four times for 293T cells and primary breast cells of each patient (n = 15). Bar graphs show mean  $\pm$  SD.
